# 1 **Severe COVID-19 patients display a back boost of seasonal** 2 **coronavirus-specific antibodies**

3 Brenda M. Westerhuis PhD<sup>1</sup>, Muriel Aguilar-Bretones MSc<sup>1</sup>, Matthijs P. Raadsen MD<sup>1</sup>, Erwin  
4 de Bruin BSc<sup>1</sup>, Nisreen M.A. Okba PhD<sup>1</sup>, Bart L. Haagmans PhD<sup>1</sup>, Thomas Langerak MD<sup>1</sup>, Henrik  
5 Endeman MD PhD<sup>2</sup>, Johannes P.C. van den Akker MD<sup>2</sup>, Diederik A.M.P.J. Gommers MD PhD<sup>2</sup>,  
6 Eric C.M. van Gorp MD PhD<sup>1</sup>, Barry H.G. Rockx PhD<sup>1</sup>, Marion P.G. Koopmans DVM PhD<sup>1</sup>,  
7 Gijsbert P. van Nierop PhD<sup>1,\*</sup>

8

9 <sup>1</sup>Department of Viroscience and <sup>2</sup>Intensive care unit of the Erasmus Medical Centre,  
10 Wytemaweg 80, 3015 CE, Rotterdam, the Netherlands

11 \*Correspondence: [g.p.vannierop@erasmusmc.nl](mailto:g.p.vannierop@erasmusmc.nl)

12

13 Keywords: SARS-CoV-2, hCoV-OC43, seasonal coronavirus, cross-reactivity, original antigenic  
14 sin

15

16 Word count: 4550 (4100 excluding methods)

17 Inserts: 1 table, 5 figures

18 Supplemental information: 6 figures

19 **Abstract (135 words)**

20 Severe acquired respiratory syndrome coronavirus-2 (SARS-CoV-2) is the cause of  
21 coronavirus disease (COVID-19). In severe COVID-19 cases, higher antibody titers against  
22 seasonal coronaviruses have been observed than in mild cases. To investigate antibody  
23 cross-reactivity as potential explanation for severe disease, we determined the kinetics,  
24 breadth, magnitude and level of cross-reactivity of IgG against SARS-CoV-2 and seasonal CoV  
25 nucleocapsid and spike from 17 severe COVID-19 cases at the clonal level. Although patients  
26 mounted a mostly type-specific SARS-CoV-2 response, B-cell clones directed against  
27 seasonal CoV dominated and strongly increased over time. Seasonal CoV IgG responses that  
28 did not neutralize SARS-CoV-2 were boosted well beyond detectable cross-reactivity,  
29 particularly for HCoV-OC43 spike. These findings support a back-boost of poorly protective  
30 coronavirus-specific antibodies in severe COVID-19 patients that may negatively impact *de*  
31 *novo* SARS-CoV-2 immunity, reminiscent of original antigenic sin.

## 32 **Introduction (892 words)**

33 The introduction of the zoonotic severe acute respiratory syndrome coronavirus 2 (SARS-CoV-  
34 2) has led to a pandemic of acute respiratory tract disease termed COVID-19<sup>1</sup>. The majority  
35 of COVID-19 patients experience mild symptoms including fever, sore throat, cough, dyspnea,  
36 anosmia, ageusia and myalgia, none of which can be considered specific to this infection<sup>2</sup>. In  
37 some patients, SARS-CoV-2 infection leads to acute respiratory distress syndrome (ARDS) with  
38 prolonged disease course requiring treatment at an intensive care unit (ICU) and resulting in  
39 a high mortality rate<sup>2-4</sup>.

40 Risks for developing ARDS and poor disease outcome are older age and factors  
41 consistent with immune activation<sup>5</sup>. Correlates of protection for severe COVID-19 are not  
42 defined in humans but antibodies likely are important. However, there is concern that  
43 suboptimal antibody responses may also be detrimental for COVID-19 outcome<sup>6</sup>. The  
44 possibility of immune-mediated disease has been raised as a major concern for SARS-CoV-2  
45 infection and an important consideration is the infection history and resulting immunological  
46 background against seasonal coronaviruses (CoV)<sup>6,7</sup>. A lack of knowledge on specific features  
47 of the induced host response to SARS-CoV-2 in ARDS patients hampers the development of  
48 targeted treatment to prevent or overcome severe disease<sup>5</sup>. Therefore, there is an urgent  
49 need for detailed insight in the SARS-CoV-2 immune response in the context of a CoV-  
50 experienced immune system.

51 For other viruses, several mechanisms have been described on how pre-existing  
52 immunity to antigenically related viruses affect the outcome of infection. First, for influenza  
53 and dengue viruses the immunological imprint of the initial infection dominates the host  
54 response towards subsequent related infections for life<sup>8,9</sup>. This mechanism, termed “original  
55 antigenic sin” (OAS), relates to the propensity of adaptive immunity to preferentially fight

56 pathogens based on memory recall. Consequently, clones primed to target a specific epitope  
57 may dominate the response to target a new slightly different cross-reactive epitope and have  
58 reduced affinity and functionality, e.g. a poor neutralization potential for the new infection<sup>8-</sup>  
59 <sup>10</sup>. Moreover, OAS has also been linked to a delayed or weakened initiation of a new type-  
60 specific response<sup>10</sup>.

61 Second, for influenza virus increased antibody titers targeting viruses far beyond the  
62 response against the first encountered antigen alone were observed<sup>11,12</sup>. The observed boost  
63 in neutralization titers was stratified on antigenic seniority, with highest titer increase  
64 towards more senior antigens<sup>12</sup>. Also, a broad “back boost”, extending beyond cross-  
65 reactivity, after infection or vaccination has been shown<sup>11,13</sup>. This phenomenon has not yet  
66 been described for any other viral infection but may have strong implications for vaccine  
67 design and the response to infection. Although a back-boost by vaccination may be useful to  
68 maintain broad immunity to preceding strains, it may negatively affect the development of a  
69 newly induced immune response, similar to OAS<sup>9-11</sup>.

70 Structural homology between the ectodomain of SARS-CoV-2 Spike (S, SARS2-S<sub>ECTO</sub>) or  
71 nucleocapsid protein (N, SARS2-N) with those of other endemic human seasonal CoV such as  
72 hCoV-229E, -NL63, -HKU1 and -OC43 or recent epidemic strains such as SARS-CoV and Middle-  
73 East respiratory syndrome coronavirus (MERS-CoV) suggests that memory B-cells capable of  
74 expressing cross-reactive antibodies may pre-exist in patients<sup>14,15</sup>. This is exemplified by the  
75 cross-reactive antibody response towards SARS-CoV-2 in SARS-CoV infected individuals due  
76 to high sequence homology (88.6% shared amino acids in N and 69.2% in S)<sup>14,16</sup>. Structural  
77 homology between SARS-CoV-2 and seasonal CoV is lower<sup>17</sup>, yet these viruses are highly  
78 prevalent<sup>16</sup>. Repeated exposure to seasonal CoV may therefore also substantially contribute  
79 to developing a SARS-CoV-2 response<sup>18</sup>.

80           A strong SARS2-N and SARS2-S IgM and IgG response is mounted in the vast majority  
81   of infected individuals targeting the receptor binding domain ( $S_{RBD}$ ), the outer- ( $S_1$ ) and inner  
82   domains ( $S_2$ ) to various extent<sup>19</sup>. In severe COVID-19 cases this response is dominated by IgG  
83   targeting the  $S_2$  domain<sup>16,19</sup>. There was no evidence of substantial IgG cross-reactivity towards  
84   SARS-CoV-2 in healthy controls<sup>16,19</sup>. In contrast, COVID-19 patients displayed elevated serum  
85   IgG titers against the majority of seasonal CoV N and S antigens which suggests that the IgG  
86   responses against these viruses are correlated by undefined mechanisms. Strikingly, high  
87   serum OC43- $S_{ECTO}$  IgG titers are associated with COVID-19 disease severity, which might be  
88   related to stretches of amino acid sequence homology in  $S_2$  <sup>16,17</sup>. Together, these studies  
89   suggest that high antibody titers to seasonal CoV may associate with poor disease outcome  
90   in COVID-19 patients and support the hypothesis that the immunological background is key.  
91   A limitation of serological studies is that monoclonal IgG cross-reactivity patterns cannot be  
92   defined and the functional contribution of seasonal CoV-specific IgG clones to immune  
93   protection or immunopathogenesis remains largely unknown.

94           At the clonal level, it was shown that pre-existing SARS-CoV-2 cross-reactive IgG  
95   memory B-cells predominantly target the SARS-CoV-2  $S_2$  with limited virus neutralization (VN)  
96   potential<sup>20</sup>. Besides a shared epitope that has been described in  $S_2$  of SARS-CoV-2 and OC43<sup>21</sup>,  
97   little is known on seasonal CoV IgG cross-reactivity patterns with SARS-CoV-2 and their  
98   functional contribution. Pre-existing CoV-specific B-cells may provide protection from SARS-  
99   CoV-2 infection by rapid production of cross-reactive antibodies that aid in viral clearance,  
100   e.g. by a faster rise of cross-neutralizing antibodies from memory recall compared to initiating  
101   a primary humoral response<sup>22,23</sup>. However, based on observations in other viral infections,  
102   pre-existing immunity may also promote pathology<sup>7</sup>.

103            Here, we longitudinally enumerated and categorized type-specific and cross-reactive  
104    circulating B-cell clones targeting an array of N and S antigens from a broad selection of  
105    human CoV in order to gain insight in immune kinetics, magnitude, breadth and function  
106    towards SARS-CoV-2 in COVID-19 patients admitted to the intensive care unit (ICU).

107

## 108    **Methods (485 words)**

### 109    *Patient characteristics and clinical specimen*

110    PCR-confirmed COVID-19 patients<sup>24</sup> admitted to the ICU at the Erasmus Medical Center with  
111    acute respiratory distress syndrome (ARDS) were included in a biorepository study (MEC-  
112    2017-417) and samples were analyzed according to the SARS-CoV-2 protocol (MEC-2020-  
113    0222) with approval from the medical ethical committee of the Erasmus MC. Personal or  
114    deferred informed written consent was obtained after recovery or from a legal  
115    representative, partner or family member of the participant respectively, all in compliance  
116    with the Declaration of Helsinki. Plasma and peripheral blood mononuclear cells (PBMC) were  
117    isolated from EDTA vacutainer blood collection tubes (BD biosciences) aliquoted and  
118    cryopreserved as described elsewhere<sup>25</sup>. Weekly serum and EDTA blood samples for PBMC  
119    isolation were collected where the initial sample was collected within 2 days after admittance  
120    to the ICU until patients were released from the ICU. From patients 1–6, samples from the  
121    first three weeks were included in this study for longitudinal analysis. Additional serum  
122    samples from later time points were included in the study if available. Additionally, 11 cross-  
123    sectionally sampled COVID-19 patients were selected based on differential clinical outcome  
124    of infection. Six succumbed to, and five recovered from SARS-CoV-2 infection (Table 1).

125

126 *B-cell profiling*

127 B-cells were isolated from cryopreserved PBMC using the EasySep human CD19 positive  
128 selection kit (Stem Cell technologies) according to manufacturer's instructions. Oligoclonal  
129 cultures of 100-300 CD19+ B-cells per well were seeded in 96 wells U-bottom plates in AIM-V  
130 AlbuMAX medium supplemented with 10% fetal bovine serum, penicillin-streptomycin (all  
131 Invitrogen) and  $\beta$ -mercaptoethanol (Sigma) (B-cell medium). Oligoclonal B-cell cultures were  
132 stimulated using 1000 L-CD40L cells that were growth arrested by 40Gray  $\gamma$ -irradiation, 50  
133 U/ml IL-2 (Novartis), 10 ng/ml IL-10 (Peprotech), 25 ng/ml IL-21 (Peprotech) and 1  $\mu$ g/ml R848  
134 (Invivogen) for 48 hours and subsequently cultured for 12 days in B-cell medium  
135 supplemented with 25ng/ml IL-21. Culture supernatants were harvested and reactivity of  
136 secreted IgG was determined using protein microarray analysis.

137

138 *Protein micro-array analysis*

139 Reactivity of secreted IgG in oligoclonal culture supernatants towards an array of CoV N and  
140 S proteins was analyzed using protein microarray analysis (PMA) as described elsewhere<sup>26</sup>.  
141 Paired sera of the respective PBMC samples were included in the analysis. Microarray slides  
142 were scanned using a Powerscanner (Tecan, Switzerland). Background was determined for  
143 each spot and mean fluorescence intensity signal (MFI, range 1 – 65,000) of two spots was  
144 calculated for each serum or culture supernatant. For B-cell culture supernatants a cut-off  
145 was set at 1,000 MFI for all antigens based on the highest signal of non-reactive cultures.  
146 Serum IgG titers were calculated using 4-parameter logistic regression with inflection point  
147 as titer<sup>27</sup>.

148

149 *Virus neutralization assays*

150 Virus neutralization was determined by plaque reduction neutralization titers as previously  
151 described<sup>17</sup>.

152

153 *Statistical analysis*

154 Serum IgG and virus neutralization titers and mean fluorescent intensity values of protein  
155 microarray analysis were <sup>2</sup>Log transformed for regression analysis. P-values below 0.05 were  
156 considered statistically significant. All analyses were performed using 'R' and Graphpad Prism  
157 7 as previously described<sup>18,27</sup>.

158

159 **Results (1896 words)**

160 *Clinical characteristics of study participants*

161 Seventeen severe COVID-19 patients with moderate to severe ARDS were included in this  
162 study, shortly after being admitted to the ICU or the Erasmus MC, Rotterdam (Table 1). From  
163 six patients we included three or more longitudinal samples. All patients were tested RT-PCR  
164 positive for SARS-CoV-2 and required mechanical ventilation during their stay at ICU. Five  
165 females (mean age = 67.2y, range = 54-75y), and 12 males were included in the study (mean  
166 age = 59.9y, range = 29-77y). Five patients died, nine recovered and three were transferred  
167 to different hospitals for further treatment. Thirteen out of seventeen patients suffered from  
168 one or more comorbidities, of which hypertension (n=6), and type 2 diabetes mellitus (n=5),  
169 were the most common. Nine patients experienced thrombotic complication during their stay  
170 at the ICU (Table 1).

171



172 *Serum IgG titers towards a broad range of coronavirus N and S antigens increased after SARS-*  
173 *CoV-2 infection in severe COVID-19 patients*

174 All patients mounted a strong SARS-CoV-2 immune response shown by rising IgG titers against  
175 SARS2-S<sub>ECTO</sub>, SARS2-S<sub>1</sub> and SARS2-S<sub>RBBD</sub> which peaked around 4 weeks post onset of clinical  
176 symptoms (Figure 1A and Supplementary figure 1A for individual patients). These patients  
177 were assumed never exposed to SARS-CoV and MERS-CoV. Nevertheless, there was a strong  
178 IgG response towards all SARS-CoV antigens. Given the high structural similarities between N  
179 and S of SARS-CoV and SARS-CoV-2<sup>16,28</sup>, likely a cross-reactive response was mounted. The  
180 increase in MERS-S<sub>ECTO</sub> IgG, but not MERS-N and MERS-S<sub>1</sub> IgG and highest amino acid  
181 homology within S<sub>2</sub> with SARS-CoV-2 suggested this cross-reactive response targeted MERS-  
182 S<sub>2</sub><sup>17</sup>.

183 Besides the SARS-CoV-2 IgG response, serum IgG reactivity towards various, but not  
184 all seasonal CoV antigens, increased in longitudinally analyzed COVID-19 patients (Figure 1A  
185 and Supplementary figure 1A). All patients showed IgG reactivity towards at least one of the  
186 229E, NL63, HKU1 or OC43 antigens (Supplementary figure 1A). Potential IgG cross-reactivity  
187 in serum responses refutes any firm conclusions on previous exposure against these CoV. For  
188 S, OC43-S<sub>ECTO</sub> IgG titers were immunodominant at inclusion in all six patients and titers  
189 increased in five out of six patients during follow-up.

190

191 *Severe COVID-19 patients showed outgrowth of circulating B-cells targeting a broad range of*  
192 *coronaviruses*

193 To analyze the kinetics of the IgG response we longitudinally enumerated circulating B-cell  
194 clones targeting CoV proteins using B-cell profiling on six severe COVID-19 patients  
195 (Supplementary figure 1B). Paired CD19+ B-cells isolated from PBMC of COVID-19 patients

216 were stimulated oligoclonally *in vitro* at a limiting density that was empirically tested to give  
217 a clonal B-cell response. Supernatants were individually screened for IgG reactivity towards  
218 all available CoV antigens using PMA. The number of reactive B-cells was normalized for the  
219 number of screened B-cells in order to compare frequencies between different samples  
220 (Figure 1B). Overall, the frequency and total reactivity of *in vitro* stimulated peripheral blood-  
221 derived B-cells was representative for the total serum IgG reactivity (Figure 1B and  
222 supplementary figure 1B). Similar to serum IgG reactivity, all patients showed a strong  
223 increase in SARS-CoV-2 reactive B-cells and the number of B-cell clones reactive towards  
224 various seasonal CoV antigens increased after SARS-CoV-2 infection. However, the frequency  
225 of HKU1-N reactive B-cells was higher than expected based on the low serum reactivity.  
226 Potentially, this difference reflects a different level of B-cell activation *in vitro* and *in vivo*. The  
227 linear outgrowth of B-cells reactive towards OC43-S<sub>ECTO</sub>, SARS-S<sub>ECTO</sub>, SARS2-S<sub>ECTO</sub>, SARS2-S<sub>1</sub>  
228 and SARS2-S<sub>RBD</sub> displayed strikingly similar kinetics in their response (Figure 1C).

209

### 210 *Coronavirus type-specific and cross-reactive IgG clones increased during SARS-CoV-2 infection*

211 The outgrowth of B-cells that do not target SARS-CoV-2 antigens is potentially related to  
212 cross-reactivity. Therefore, we analyzed the multiplex PMA profiles of *in vitro* stimulated B-  
213 cell cultures to address the level of cross-reactivity of monoclonal IgG. Profiles of CoV antigen-  
214 reactive cultures are shown for a representative patient (patient 4, Figure 2). N-reactive  
215 clones from this donor showed substantial cross-reactivity between 229E-N, NL63-N and  
216 HKU1-N at all time points (Figure 2A). Although individual clones with aberrant cross-  
217 reactivity can be identified in these patients, we hypothesize these contribute little to the  
218 overall IgG response. A Pearson correlation test was used to calculate the strength and  
219 robustness of cross-reactivity between each pair of antigens to identify cross-reactivity

220 patterns that significantly contribute to the induced immune response (Figure 2B). The level  
221 of cross-reactivity as calculated by Pearson correlation test varied slightly over time due to  
222 the limited number of clones per sample. Overall, the cross-reactivity patterns between 229E-  
223 N, NL63-N and HKU1-N became more apparent and statistically more significant when all  
224 clones from three time points (n=125) are combined for analysis (Figure 2B). OC43-N and  
225 MERS-N clones displayed no cross-reactivity and cross-reactivity between SARS-N and  
226 seasonal CoV was considered non-substantial (Figure 2A/B).

227 S-reactive IgG clones showed an increasing mostly SARS-CoV-2 type-specific response  
228 with increasing numbers of detected SARS2-S<sub>ECTO</sub> and SARS2-S<sub>1</sub> B-cell clones. Strong SARS2-  
229 S<sub>ECTO</sub> and SARS2-S<sub>1</sub> cross-reactivity indicated that mostly shared epitopes within S<sub>1</sub> were  
230 targeted in this patient (Figure 2C and D). The frequency and number of detected SARS2-S<sub>RBD</sub>  
231 clones remained more or less stable, yet cross-reactivity towards SARS2-S<sub>ECTO</sub> and SARS2-S<sub>1</sub>  
232 increased over time suggesting maturation of the SARS-CoV-2 specific response. The initial  
233 lack of cross-reactivity of SARS2-S<sub>RBD</sub> towards SARS2-S<sub>ECTO</sub> and SARS2-S<sub>1</sub> suggested that the  
234 epitope(s) targeted by the SARS2-S<sub>RBD</sub> clones at day 9 were sterically hindered or displayed in  
235 an alternative conformation in the larger SARS-CoV-2 S proteins on PMA (Figure 2C). The  
236 increasing cross-reactivity suggests clones that target epitopes displayed on the outer surface  
237 of S are naturally selected.

238 Strikingly, there was a dominant OC43-S<sub>ECTO</sub>-specific response that increased over  
239 time. This response significantly cross-reacted with HKU1-S<sub>ECTO</sub> and SARS-S<sub>ECTO</sub>, but not  
240 SARS2-S<sub>ECTO</sub> (Figure 2D). This suggests the outgrowth of OC43-S<sub>ECTO</sub> clones is not driven by  
241 SARS-CoV-2 cross-reactivity. The limited cross-reactivity between OC43-S<sub>ECTO</sub> and OC43-S<sub>1</sub>  
242 suggested these clones predominantly target S<sub>2</sub>. The correlated response between the paired

243 S<sub>1</sub> and S<sub>ECTO</sub> antigens of NL63-, HKU1-, MERS-, SARS- and SARS-CoV-2 validated availability of  
244 shared epitopes in both antigens.

245 The total number of detected S<sub>ECTO</sub>-reactive clones (n=363) outnumbered S<sub>1</sub>-reactive  
246 clones (n=85) and showed greater cross-reactivity between different CoV compared to the S<sub>1</sub>.  
247 These data suggested clones targeting S<sub>2</sub> are immunodominant and more cross-reactive in  
248 this donor.

249 For the other five longitudinally analyzed donors, similar patterns were observed with  
250 *i)* high levels of cross-reactivity between 229E-N, NL63-N and HKU1-N but not SARS-N and  
251 MERS-N *ii)* a mostly SARS-CoV-2 type-specific response that strongly increased over time, *iii)*  
252 an OC43-S<sub>2</sub>-specific response that increased over time with limited cross-reactivity towards  
253 SARS-CoV-2. Notably, the N-reactivity of 1/6 patients showed increased cross-reactivity  
254 between OC43-N and other seasonal strains (Supplementary figure 6). OC43-S<sub>ECTO</sub>-specific B-  
255 cells were immunodominant in 3/6 patients (Supplementary figure 1B) and the S<sub>2</sub> response  
256 was immunodominant in 2/6 patients (Supplementary figures 2–6).

257

258 *N-IgG selectively cross-reacted between seasonal coronaviruses while S-IgG showed complex*  
259 *cross-reactivity patterns involving all strains*

260 In order to determine the overall pattern of IgG cross-reactivity between N and S of different  
261 CoV in severe COVID-19 patients we pooled all available N (n=2039, Figure 3A) and S-reactive  
262 IgG clones (n=2699, Figure 3B) from all 17 included donors. For N, Pearson correlation analysis  
263 validated that 229E-N, NL63-N and HKU1-N IgG clones most substantially cross-reacted (range  
264 R=0.52 – 0.72, all p<0.0001, Figure 3C). Additionally, weak yet highly significant correlations  
265 between OC43-N and other seasonal CoV strains were observed (range R=0.066 – 0.14, all  
266 p<0.003). Conversely, no significant cross-reactivity was detected between seasonal and

267 emerging CoV indicating different epitopes to be involved for these recent zoonotic strains  
268 (Figure 3C).

269 The combined analysis of all S-IgG clones showed complex cross-reactivity patterns,  
270 including endemic seasonal and epidemic zoonotic strains (Figure 3D). All SARS-CoV and SARS-  
271 CoV-2 S antigens positively correlated (range  $R=0.14 - 0.80$ , all  $p<0.0001$ ). Additionally, all  
272 corresponding  $S_1$  and  $S_{ECTO}$  antigens positively correlated (range  $R=0.35 - 0.80$ , all  $p<0.0001$ )  
273 validating availability of shared epitopes in paired antigens for all CoV strains.

274 Our cohort showed there was broad cross-reactivity within  $S_1$  between 229E-, NL63-,  
275 HKU1- and OC43-CoV but not MERS-CoV. For MERS-CoV significant cross-reactivity was  
276 restricted to  $S_{ECTO}$ , suggesting cross-reactive epitopes are mostly located in  $S_2$  (Figure 3D).

277

278 *Correlated clonal IgG reactivity patterns showed in vivo expansion of OC43- $S_{ECTO}$  specific B-*  
279 *cells beyond detectable cross-reactivity*

280 Given the synergistic outgrowth of OC43- $S_{ECTO}$  and SARS-CoV and SARS-CoV-2 S-reactive B-  
281 cells in severe COVID-19 patients (Figure 1C) one would presume that SARS-CoV-2 cross-  
282 reactivity drives *in vivo* expansion of OC43- $S_{ECTO}$ -specific B-cells. However, cross-reactivity  
283 between OC43- $S_{ECTO}$  and SARS-CoV-2 S antigens showed significant weak negative  
284 correlations (range  $R=-0.038 - -0.088$ , range  $p=4,7 \times 10^{-6} - 0.014$ ) suggesting that OC43- $S_{ECTO}$   
285 specific clones are unlikely to cross-react with SARS-CoV-2 S in severe COVID-19 patients  
286 (Figure 3B). Indeed, the majority of OC43- $S_{ECTO}$  clones (752 out of 920 clones, 82%) did not  
287 cross-react with SARS-CoV-2 indicating these were initiated prior to SARS-CoV-2 infection.  
288 Due to lack of a pre-sample we cannot draw firm conclusions on pre-existence of SARS-CoV-  
289 2 cross-reactive clones in this cohort.

290           Longitudinal analysis of OC43-S<sub>ECTO</sub> clones in all 17 patients, grouped per week number  
291 post onset of symptom showed the average relative number of clones that cross-reacted with  
292 SARS-CoV-2 S antigens showed a moderate increase over 4 weeks (13 – 21%). The OC43-S<sub>ECTO</sub>-  
293 reactive clones that cross-reacted increasingly recognized epitopes in SARS2-S<sub>1</sub> and SARS2-  
294 S<sub>RBD</sub> indicating there was natural selection of SARS-CoV-2 cross-reactive clones specific for the  
295 outer S domains (Figure 4).

296

297 *No evidence for functional contribution of OC43-S<sub>ECTO</sub>-specific IgG in virus neutralization*

298 To determine what CoV-specific IgG functionally contribute to clearing SARS-CoV-2 infection  
299 via virus neutralization (VN) we correlated serum S reactive IgG to serum SARS-CoV-2 VN  
300 titers. All SARS-CoV and SARS-CoV-2 S antigens selectively positively correlated with serum  
301 SARS-CoV-2 VN titers but none of the other CoV S antigens. This is congruent with SARS-  
302 CoV/SARS-CoV-2 cross-reactivity patterns and other studies showing that S is the dominant  
303 antigenic target of neutralizing clones<sup>29,30</sup>. Notably, no correlation was detected between VN  
304 and serum OC43-S<sub>ECTO</sub> and OC43-S<sub>1</sub> IgG titers (Figure 5A).

305           To determine what circulating S-specific B-cells contribute to VN, the normalized S-  
306 reactive B-cell counts were correlated with paired serum SARS-CoV-2 VN titers. Similar to  
307 serum IgG titers, SARS2-S<sub>ECTO</sub>, SARS-S<sub>1</sub> and SARS2-S<sub>1</sub> correlated with serum VN titers.  
308 Contrasting to serum titers, OC43-S<sub>1</sub> B-cell numbers showed a positive correlation with VN.  
309 Notably, the relatively low frequency of OC43-S<sub>1</sub>-reactive B-cells (<0.01% of screened B-cells)  
310 suggested the potential functional contribution of these clones to VN *in vivo* was limited.  
311 Contrasting to serum IgG, SARS2-S<sub>RBD</sub> B-cell counts did not reach significance in correlation  
312 with VN titers (p=0.13), which may be related to the limited number of samples analyzed  
313 (n=22). Notably, neither OC43-S<sub>ECTO</sub>-specific serum IgG nor circulating specific B-cells

314 correlated with serum SARS-CoV-2 VN, which suggests that the strong OC43-S<sub>ECTO</sub> response  
315 had no substantial contribution to SARS-CoV-2 neutralization (Figure 5B).

316

### 317 **Discussion (1276 words)**

318 Multiplex IgG analysis of culture supernatants of *in vitro* activated B-cell cultures at limiting  
319 dilutions allowed us to *i)* categorize strain-specific from cross-reactive monoclonal IgG, *ii)*  
320 distinguish pre-existing clones targeting seasonal CoV from newly induced SARS-CoV-2-type  
321 specific and cross-reactive clones, *iii)* perform in-depth analysis of humoral immune kinetics  
322 in severe COVID-19 patients. Together with paired serological analysis these data gave  
323 detailed insight in the magnitude, breadth and cross-reactivity patterns of the SARS-CoV-2  
324 induced immune response in severe COVID-19 patients.

325         Severe COVID-19 patients displayed an evolving SARS-CoV-2 specific IgG response that  
326 correlated with the increasing SARS-CoV-2 neutralization potential of serum during disease  
327 progression. Additionally, these patients displayed a strong rise of pre-existing seasonal CoV-  
328 specific clones that did not correlate with SARS-CoV-2 neutralizing titers, which is suggestive  
329 of OAS. Based on this mechanism, one would expect that cross-reactivity to SARS-CoV-2  
330 would drive outgrowth of pre-existing seasonal CoV-specific B-cells. However, here we  
331 observed a strong outgrowth of clones that selectively targeting seasonal CoV. Using Pearson  
332 regression analysis, we were able to distinguish rare from substantial cross-reactivity  
333 patterns. Although clones were identified that showed SARS-CoV-2 cross-reactivity, these had  
334 a minor contribution to the overall SARS-CoV-2 response.

335         For N, very limited cross-reactivity was observed between seasonal and emerging CoV  
336 strains. Even though we could not confirm this for SARS-CoV-2, the high level of SARS2-N and  
337 SARS-N sequence homology (88.6%) and reported strong correlation between serum SARS2-

338 N and SARS-N IgG titers<sup>16</sup> suggests SARS-N may be used as a proxy of SARS2-N. This suggests  
339 the outgrowth of 229E-N, NL63-N and HKU1-N reactive IgG clones was not selectively driven  
340 by cross-reactivity.

341 The outgrowth of seasonal CoV-reactive B-cell clones was most striking for OC43-S<sub>ECTO</sub>.  
342 OC-43-S<sub>ECTO</sub>-reactive clones outnumbered others in the majority of patients and showed a  
343 synergistic outgrowth with the SARS-CoV-2-reactive B-cells. Of OC43-S<sub>ECTO</sub> reactive clones  
344 only a minor fraction cross-reacted with OC43-S<sub>1</sub> (66 out of 920 clones, 7%). This suggests the  
345 majority of OC43-S<sub>ECTO</sub> clones target S<sub>2</sub>, which corresponds with previous studies<sup>16,21</sup>. The  
346 fraction of OC43-S<sub>ECTO</sub> clones that cross-reacted with SARS-CoV-2 was limited (168 out of 920  
347 clones, 18%) but for the clones that did, reactivity was increasingly directed towards SARS2-  
348 S<sub>1</sub> and SARS2-S<sub>RBBD</sub> and not S<sub>2</sub>. As IgG targeting S<sub>1</sub> and S<sub>RBBD</sub> confer the strongest VN potential,  
349 these OC43-S<sub>ECTO</sub> clones contribute to evolving SARS-CoV-2-specific IgG response<sup>23,31</sup>.

350 OC43-S<sub>2</sub> clones potentially have low-affinity reactivity towards SARS-CoV-2, that is  
351 below the detection limit of protein microarray, which drives expansion of OC43-S<sub>ECTO</sub> clones.  
352 This is of interest because low affinity antibodies, with consequentially a poor neutralizing  
353 potential, can mediate engagement of Fc receptors (FcRs) on innate immune cells and  
354 promote viral entry through a mechanism termed antibody-dependent enhancement (ADE).  
355 This may either result in productive infection and increased viral spread – this was shown for  
356 flaviviruses<sup>32</sup> – or promote inflammation and tissue damage, as was described for SARS-  
357 CoV<sup>33–35</sup>. However, the level of OC43-S<sub>ECTO</sub> clones that cross-react with SARS2-S<sub>2</sub> remained  
358 stable over time, as determined by the OC43-S<sub>ECTO</sub> clones that selectively cross-react with  
359 SARS2-S<sub>ECTO</sub> (Week 1, 7%; week 2, 4 %; week 3, 4% and week >4, 5%). If OC43-S<sub>ECTO</sub> clones  
360 were selectively expanding due to undetected low affinity cross-reactivity, one would expect  
361 that clones that have detectable cross-reactivity to have a growth advantage. The reason for



362 this is that the clonal selection of B-cells is driven by the affinity of the B-cell antigen receptor  
363 and SARS-S<sub>ECTO</sub>-specific T<sub>H</sub>-cell-mediated linked recognition of antigens, the presence of which  
364 has been confirmed in an largely overlapping patient cohort<sup>25</sup>.

365 We find no evidence of a functional contribution of OC43-S<sub>ECTO</sub> reactive IgG to SARS-  
366 CoV-2 VN. OC43-S<sub>1</sub> specific clones did correlate with SARS-CoV-2 VN titers although these  
367 clones represent only a minor fraction of OC43-CoV specific clones. While it is possible that  
368 OC43-S<sub>ECTO</sub> specific IgG restrict viral replication by indirect mechanisms, they may also play  
369 no role, or even have a detrimental effect by delaying the development of a type-specific  
370 response or by enhancing immune pathology<sup>36</sup>. The previously reported selective association  
371 of increased OC43-S<sub>ECTO</sub> IgG reactivity in severe versus mild COVID-19 patients supports a  
372 potential role in immunopathology<sup>16</sup>. Unfortunately, the limited volume of B-cell culture  
373 supernatants was insufficient to perform in-depth analysis of their affinity or function at the  
374 clonal level and deserves follow-up studies.

375 Alternatively, the outgrowth of clones with reactivity towards the highly seroprevalent  
376 seasonal strains may relate to a general immune activation induced by a hyper-inflammatory  
377 state of the immune system<sup>37</sup>. However, for individual patients, not all CoV-reactive B-cells  
378 show similar outgrowth after SARS-CoV-2 infection. Furthermore, the low serum IgG  
379 reactivity towards HKU1-N and relatively high frequency of HKU1-N-reactive clones suggests  
380 these B-cell are not activated *in vivo*. Together, these data do not support this hypothesis.

381 Overall, our data suggest that cross-reactivity towards SARS-CoV-2 has a minor  
382 contribution to the outgrowth of clones targeting seasonal CoV and *vice versa*. The boosted  
383 response involves a broad range of seasonal CoV strains. For influenza virus, the gradual  
384 antigenic evolution allows preceding exposures to different virus strains to be chronologically  
385 ordered to determine antigen seniority<sup>12</sup>. For seasonal CoV, the order and time window at

386 which individuals were infected or reinfected cannot be deferred. Potentially, the strong and  
387 dominant OC43-S<sub>ECTO</sub> response observed in severe COVID-19 patients relates to antigenic  
388 seniority, but this cannot be confirmed. Regardless of the unknown timeline of preceding  
389 infections, the outgrowth of seasonal CoV-specific clones is similar to the back-boost that was  
390 initially described for influenza<sup>11</sup>. Here, using antibody landscapes of hemagglutination  
391 inhibition titers it was shown that infection or vaccination induced a broad increase in titers  
392 towards preceding viruses<sup>11,13</sup>. Based on the antigenic distance it was calculated that the back  
393 boost extended beyond cross-reactivity<sup>11,13</sup>. However, this mechanism was never validated  
394 by antigen binding at a clonal level or shown for any other infectious agents. To our  
395 knowledge, we present the first data on a back boost of IgG clones towards a different virus  
396 family and substantiate this mechanism with clonal reactivity.

397 For influenza, back-boost is considered to have a positive contribution to vaccine  
398 response by helping maintain immunity towards a broad range of influenza viruses and  
399 allowing improved coverage by preemptive vaccination updates<sup>11</sup>. Contrastingly, in OAS,  
400 clones initiated by prior infections are shown to negatively impact *de novo* type-specific  
401 response and worsen clinical outcome<sup>8-10,13,38</sup>. Whether the SARS-CoV-2-specific response is  
402 hampered by back-boost of seasonal clones, similar to what has been described for OAS, is of  
403 interest. Immune dominance of IgG reactivity towards seasonal CoV and the late peak SARS-  
404 CoV-2 response in these severe COVID-19 patients, 4 weeks after onset of clinical symptoms,  
405 suggests the initiation of the SARS-CoV-2 response may be hampered by proliferation of  
406 seasonal CoV-specific clones.

407 In summary, the detailed insights in kinetics and cross-reactivity patterns of N and S-  
408 reactive IgG presented in this study will aid in the interpretation of serological assays and  
409 expands our understanding of how the humoral immune system responds towards a novel

410 CoV. Also, it shows that studies on in-depth functional characterization of the boosted or  
411 newly induced antibody clones after SARS-CoV-2 infection, e.g. VN and ADE assays, are  
412 warranted. These data are critical to identify correlates of protection and drivers of  
413 immunopathology for COVID-19 and may provide key insights for efficacy and safety testing  
414 of future vaccines. Furthermore, the back boost of seasonal CoV IgG shows the immunological  
415 background of individuals needs to be considered as an important factor in assessing the  
416 quality and quantity of a newly initiated response towards SARS-CoV-2, either by infection or  
417 vaccination.

418

#### 419 **Acknowledgements**

420 This work has received funding from the European Union's Horizon 2020 research and  
421 innovation program under grant agreements No. 874735 (VEO) and No. 101003589  
422 (RECoVER) and the Netherlands Organisation for Health Research and Development  
423 (ZONMW) grant agreement 10150062010008. We kindly acknowledge Felicity Chandler BSc  
424 for technical assistance, Ron A.M. Fouchier PhD and Georges M.G.M. Verjans PhD for  
425 scientific discussions (all Erasmus MC, Rotterdam, the Netherlands) and Berend-Jan Bosch  
426 PhD for supplying SARS-CoV-2 and OC43-SECTO antigens (University of Utrecht, the  
427 Netherlands).

428

#### 429 **Competing interest statement**

430 The authors have no competing interests

## 431 References

- 432 1. Zhu, N. *et al.* A novel coronavirus from patients with pneumonia in China, 2019. *N.*  
433 *Engl. J. Med.* **382**, 727–733 (2020).
- 434 2. Huang, C. *et al.* Clinical features of patients infected with 2019 novel coronavirus in  
435 Wuhan, China. *Lancet* **395**, 497–506 (2020).
- 436 3. Wang, D. *et al.* Clinical characteristics of 138 hospitalized patients with 2019 novel  
437 coronavirus-infected pneumonia in Wuhan, China. *JAMA - J. Am. Med. Assoc.* **323**,  
438 1061–1069 (2020).
- 439 4. Chen, N. *et al.* Epidemiological and clinical characteristics of 99 cases of 2019 novel  
440 coronavirus pneumonia in Wuhan, China: a descriptive study. *Lancet* **395**, 507–513  
441 (2020).
- 442 5. Wu, C. *et al.* Risk factors associated with acute respiratory distress syndrome and  
443 death in patients with coronavirus disease 2019 pneumonia in Wuhan, China. *JAMA*  
444 *Intern. Med.* **180**, 934–943 (2020).
- 445 6. Iwasaki, A. & Yang, Y. The potential danger of suboptimal antibody responses in  
446 COVID-19. *Nature Reviews Immunology* **20**, 339–341 (2020).
- 447 7. Lee, W. S., Wheatley, A. K., Kent, S. J. & DeKosky, B. J. Antibody-dependent  
448 enhancement and SARS-CoV-2 vaccines and therapies. *Nat. Microbiol.* **5**, 1–7 (2020).
- 449 8. Halstead, S. B., Rohanasuphot, S. & Sangkawibha, N. Original antigenic sin in dengue.  
450 *Am. J. Trop. Med. Hyg.* **32**, 154–156 (1983).
- 451 9. Rey, F. A., Stiasny, K., Vaney, M.-C., Dellarole, M. & Heinz, F. X. The bright and the  
452 dark side of human antibody responses to flaviviruses: lessons for vaccine design.  
453 *EMBO Rep.* **19**, 206–224 (2018).
- 454 10. Kim, J. H., Skountzou, I., Compans, R. & Jacob, J. Original antigenic sin responses to

- 455 influenza viruses. *J. Immunol.* **183**, 3294–3301 (2009).
- 456 11. Fonville, J. M. *et al.* Antibody landscapes after influenza virus infection or vaccination.  
457 *Science (80-. )*. **346**, 996–1000 (2014).
- 458 12. Lessler, J. *et al.* Evidence for antigenic seniority in influenza A (H3N2) antibody  
459 responses in southern China. *PLoS Pathog.* **8**, 26 (2012).
- 460 13. Meade, P. *et al.* Influenza virus infection induces a narrow antibody response in  
461 children but a broad recall response in adults. *MBio* **11**, 1–15 (2020).
- 462 14. Loganathan, S. K. *et al.* Rare driver mutations in head and neck squamous cell  
463 carcinomas converge on NOTCH signaling. *Science* **367**, 1264–1269 (2020).
- 464 15. Lv, H. *et al.* Cross-reactive antibody response between SARS-CoV-2 and SARS-CoV  
465 infections. *Cell Rep.* **31**, 1–20 (2020).
- 466 16. Wang, Y. *et al.* Kinetics of viral load and antibody response in relation to COVID-19  
467 severity. *J. Clin. Invest.* **130**, (2020).
- 468 17. Okba, N. M. A. *et al.* Severe acute respiratory syndrome coronavirus 2-specific  
469 antibody responses in coronavirus disease patients. *Emerg. Infect. Dis.* **26**, 1478–1488  
470 (2020).
- 471 18. Westerhuis, B. M. *et al.* Homologous and heterologous antibodies to coronavirus  
472 229E NL63 OC43 HKU1 SARS MERS and SARS-CoV-2 antigens in an age stratified  
473 cross-sectional serosurvey in a large tertiary hospital in The Netherlands. *medRxiv*  
474 (2020).
- 475 19. Long, Q. X. *et al.* Antibody responses to SARS-CoV-2 in patients with COVID-19. *Nat.*  
476 *Med.* **26**, 845–848 (2020).
- 477 20. Ng, K. *et al.* Pre-existing and de novo humoral immunity to SARS-CoV-2 in humans.  
478 *bioRxiv* 2020.05.14.095414 (2020). doi:10.1101/2020.05.14.095414

- 479 21. Ladner, J. T. *et al.* Epitope-resolved profiling of the SARS-CoV-2 antibody response  
480 identifies cross-reactivity with an endemic human CoV. *bioRxiv Prepr. Serv. Biol.*  
481 2020.07.27.222943 (2020). doi:10.1101/2020.07.27.222943
- 482 22. Shrock, E. *et al.* Viral epitope profiling of COVID-19 patients reveals cross-reactivity  
483 and correlates of severity. *Science* (2020). doi:10.1126/science.abd4250
- 484 23. Wec, A. Z. *et al.* Broad neutralization of SARS-related viruses by human monoclonal  
485 antibodies. *Science (80-. )*. **369**, 731–736 (2020).
- 486 24. Corman, V. M. *et al.* Detection of 2019 novel coronavirus (2019-nCoV) by real-time  
487 RT-PCR. *Eurosurveillance* **25**, 1–8 (2020).
- 488 25. Weiskopf, D. *et al.* Phenotype and kinetics of SARS-CoV-2-specific T cells in COVID-19  
489 patients with acute respiratory distress syndrome. *Sci. Immunol.* **5**, 1–14 (2020).
- 490 26. Koopmans, M. *et al.* Profiling of humoral immune responses to influenza viruses by  
491 using protein microarray. *Clin. Microbiol. Infect.* **18**, 797–807 (2012).
- 492 27. Westerhuis, B. *et al.* Specific memory B cell response in humans upon infection with  
493 highly pathogenic H7N7 avian influenza virus. *Sci. Rep.* **10**, 3152 (2020).
- 494 28. Wu, A. *et al.* Genome composition and divergence of the novel coronavirus (2019-  
495 nCoV) originating in China. *Cell Host Microbe* **27**, 325–328 (2020).
- 496 29. He, Y. *et al.* Identification of immunodominant sites on the spike protein of severe  
497 acute respiratory syndrome (SARS) coronavirus: Implication for developing SARS  
498 diagnostics and vaccines. *J. Immunol.* **173**, 4050–4057 (2004).
- 499 30. Meyer, B., Drosten, C. & Müller, M. A. Serological assays for emerging coronaviruses:  
500 Challenges and pitfalls. *Virus Res.* **194**, 175–183 (2014).
- 501 31. Barnes, C. O. *et al.* Structures of human antibodies bound to SARS-CoV-2 spike reveal  
502 common epitopes and recurrent features of antibodies. *Cell* **182**, 828-842.e16 (2020).

- 503 32. Katzelnick, L. C. *et al.* Antibody-dependent enhancement of severe dengue disease in  
504 humans. *Science (80-. )*. **358**, 929–932 (2017).
- 505 33. Wang, S. F. *et al.* Antibody-dependent SARS coronavirus infection is mediated by  
506 antibodies against spike proteins. *Biochem. Biophys. Res. Commun.* **451**, 208–214  
507 (2014).
- 508 34. Yip, M. S. *et al.* Antibody-dependent enhancement of SARS coronavirus infection and  
509 its role in the pathogenesis of SARS. *Hong Kong Med. J.* **22**, 25–31 (2016).
- 510 35. Jaume, M. *et al.* Anti-severe acute respiratory syndrome coronavirus spike antibodies  
511 trigger infection of human immune cells via a pH- and cysteine protease-independent  
512 Fc R pathway. *J. Virol.* **85**, 10582–10597 (2011).
- 513 36. Monsalvo, A. C. *et al.* Severe pandemic 2009 H1N1 influenza disease due to  
514 pathogenic immune complexes. *Nat. Med.* **17**, 195–199 (2011).
- 515 37. Bernasconi, N. L., Traggiai, E. & Lanzavecchia, A. Maintenance of serological memory  
516 by polyclonal activation of human memory B cells. *Science (80-. )*. **298**, 2199–2202  
517 (2002).
- 518 38. Fierz, W. & Walz, B. Antibody dependent enhancement due to original antigenic sin  
519 and the development of SARS. *Front. Immunol.* **11**, 1–5 (2020).
- 520

521 **Figure legends**

522

523 **Figure 1. Severe COVID-19 patients generate a strong SARS-CoV-2-specific IgG response and**

524 **display an increasing IgG response towards other coronaviruses. A)** Longitudinal serum IgG

525 responses of six severe COVID-19 patients sampled three times with weekly intervals,

526 grouped per week number after onset of symptoms, towards a panel of nucleocapsid proteins

527 (N), the ecto- ( $S_{\text{ECTO}}$ ) and head-domains ( $S_1$ ) of spike or the SARS-CoV-2 (SARS2) receptor

528 binding domains ( $S_{\text{RBD}}$ ). A SARS-CoV-2 response is mounted in all patients, together with a

529 boost of seasonal human 229E, NL63, HKU1, OC43 and emerging MERS, SARS and SARS2

530 coronavirus antigens. Dotted line shows the assay background. **B)** Enumeration of paired *in*

531 *vitro* stimulated peripheral blood-derived B-cells at limiting density with IgG reactivity

532 towards coronavirus antigens, normalized for the number of analyzed B-cells. Box represents

533 median, upper and lower quartile. Whiskers show range. **C)** OC43- $S_{\text{ECTO}}$ , SARS- $S_{\text{ECTO}}$  SARS2-

534  $S_{\text{ECTO}}/S_1$  and spike receptor binding domain ( $S_{\text{RBD}}$ ) specific B-cell clones show a synergistic

535 linear outgrowth in the first four weeks after SARS-CoV-2 infection. Pearson correlation test,

536 solid line shows regression, dotted line shows the 95% confidence interval of the best-fit line.

537

538 **Figure 2. Supernatants of *in vitro* stimulated B-cells of a representative donor shows clonal**

539 **IgG cross-reactivity patterns towards different coronavirus strains.** B-cells were isolated

540 from peripheral blood samples of patient 4 and stimulated *in vitro* in oligoclonal cultures at

541 limiting dilution to analyze IgG reactivity at the clonal level. This representative patient was

542 analyzed at three consecutive weekly intervals starting at 9 days post onset of symptoms. **A)**

543 Heatmaps of the mean fluorescent intensity (MFI) of clonal IgG reactivity towards N of a panel

544 of coronaviruses. The number of single- and cross-reactive N-specific B-cells increased over



545 time after SARS-CoV-2 infection. **B)** Heatmaps of the Pearson regression coefficient (R, top  
546 panels) and significance (bottom panels) between N-reactivity of specific B-cell clones shows  
547 the level of cross-reactivity at weekly intervals and the clones of all time points combined. **C)**  
548 Heatmaps and **D)** regression analysis of  $S_{\text{ECTO}}$ ,  $S_1$  and  $S_{\text{RBD}}$  reactive IgG clones from the same  
549 patient is shown. Positive correlations (green shades) show clones likely cross-react, negative  
550 correlations (orange shades) show clones are likely to not cross-react. Significant associations  
551 are shown in red shades ( $p < 0.05$ ).

552

553 **Figure 3. Combined analysis of reactive clones from all donors shows cross-reactivity**  
554 **patterns between human seasonal and emerging coronaviruses.** Reactivity of N (n=2039)  
555 and S-reactive IgG clones (n=2699) identified in 17 severe COVID-19 patients was analyzed.  
556 **A)** Heatmaps show the relative amount (top panel, grey shades) and number of IgG clones  
557 reactive towards at least one (top left to bottom right diagonal) or two N antigens and the  
558 relative frequency of cross-reactivity towards these antigens (bottom panel, purple shades,  
559 numerator is shown in clone count heatmap, denominator is indicated on x-axis). **B)** Relative  
560 amount and number (left panel) and frequency (right panel) of S-cross-reactive IgG clones. **C)**  
561 Pearson regression analysis of 2039 N reactive clones shows significant cross-reactivity  
562 between all human seasonal coronaviruses. **D)** Regression analysis of 2699  $S_{\text{ECTO}}$ ,  $S_1$  and  $S_{\text{RBD}}$   
563 reactive IgG clones shows broad cross-reactivity between human seasonal and emerging  
564 coronavirus strains.

565

566 **Figure 4. OC43- $S_{\text{ECTO}}$ -reactive clones show minor yet antigenically evolving cross-reactivity**  
567 **towards SARS-CoV-2.** All OC43- $S_{\text{ECTO}}$ -reactive clones (n=920) from 17 patients were stratified  
568 by week number post onset of clinical symptoms. The proportion of single OC43- $S_{\text{ECTO}}$  (blue)

569 and SARS-CoV-2 cross-reactive clones (grey) is shown (left pie). The cross-reactivity towards  
570 a single (green colors), dual (yellow and orange colors) and three SARS-CoV-2 antigens (red  
571 color) is depicted (right pie). The number of patients analyzed is indicated on the left. The  
572 frequency and number of contributing clones for each cluster is shown inside and adjacent to  
573 each part, respectively.

574

575 **Figure 5. Serum IgG titers or normalized B-cell counts reactive towards OC43-S<sub>1</sub>, SARS-**  
576 **S<sub>ECTO</sub>/S<sub>1</sub> and SARS2-S<sub>ECTO</sub>/S<sub>1</sub> correlate with serum SARS-CoV-2 virus neutralization titers, but**  
577 **not OC43-S<sub>ECTO</sub>. A)** Linear correlation between <sup>2</sup>Log transformed serum IgG and SARS-CoV-2  
578 virus neutralization (VN) titers shows that only SARS-CoV and SARS-CoV-2 spike-reactive IgG  
579 associate with VN. Horizontal dotted line shows the background of the assay. **B)** Normalized  
580 counts of B-cells specific for SARS-S<sub>ECTO</sub>, OC43-S<sub>1</sub>, SARS-S<sub>1</sub> and SARS2-S<sub>1</sub> selectively correlate  
581 with VN. 22 Serum samples and corresponding B-cell cultures of 17 patients were included in  
582 these analyses. Solid line depicts the best-fit regression coefficient. Dashed line shows the  
583 95% confidence of the best-fit line.

**Table 1. Patient characteristics**

| Patient ID | Gender | Age group | Days post onset symptoms at inclusion | Duration stay ICU (days) | Survival <sup>1</sup> | Thrombotic complication | Comorbidities                                                                  |
|------------|--------|-----------|---------------------------------------|--------------------------|-----------------------|-------------------------|--------------------------------------------------------------------------------|
| 1          | M      | 70-80     | 10                                    | 50                       | Y                     | Y                       | None                                                                           |
| 2          | F      | 50-60     | 4                                     | 26                       | Y                     | Y                       | Hypertension                                                                   |
| 3          | M      | 50-60     | 5                                     | 17                       | Y                     | N                       | Lung disease, Malignancy                                                       |
| 4          | F      | 60-70     | 9                                     | 21                       | Y                     | N                       | None                                                                           |
| 5          | M      | 60-70     | 5                                     | 31                       | Y                     | N                       | Cardiac disease, Hypertension                                                  |
| 6          | M      | 50-60     | 12                                    | 45                       | Y                     | Y                       | Cardiac disease, Hypertension, Vascular disease, Type 2 diabetes, Lung disease |
| 7          | M      | 70-80     | 15                                    | 15                       | Y                     | N                       | Vascular disease, Type 2 diabetes                                              |
| 8          | M      | 60-70     | 14                                    | 8                        | Y                     | N                       | Malignancy                                                                     |
| 9          | M      | 50-60     | 15                                    | 10                       | Y                     | Y                       | Type 2 diabetes                                                                |
| 10         | F      | 70-80     | 20                                    | 13                       | Y                     | N                       | Hypertension                                                                   |
| 11         | F      | 70-80     | 18                                    | 10                       | N                     | Y                       | Type 2 diabetes                                                                |
| 12         | M      | 20-30     | 9                                     | 10                       | N                     | N                       | None                                                                           |
| 13         | F      | 70-80     | 16                                    | 8                        | N                     | Y                       | Cardiac disease, Vascular disease                                              |
| 14         | M      | 60-70     | 33                                    | 26                       | N                     | Y                       | Hypertension                                                                   |
| 15         | M      | 50-60     | 8                                     | 4                        | N                     | Y                       | Hypertension                                                                   |
| 16         | M      | 70-80     | 29                                    | 11                       | Y                     | Y                       | None                                                                           |
| 17         | M      | 60-70     | 13                                    | 5                        | Y                     | N                       | Cardiac disease, Type 2 diabetes                                               |

<sup>1</sup>Patients were followed up for at least 60 days.

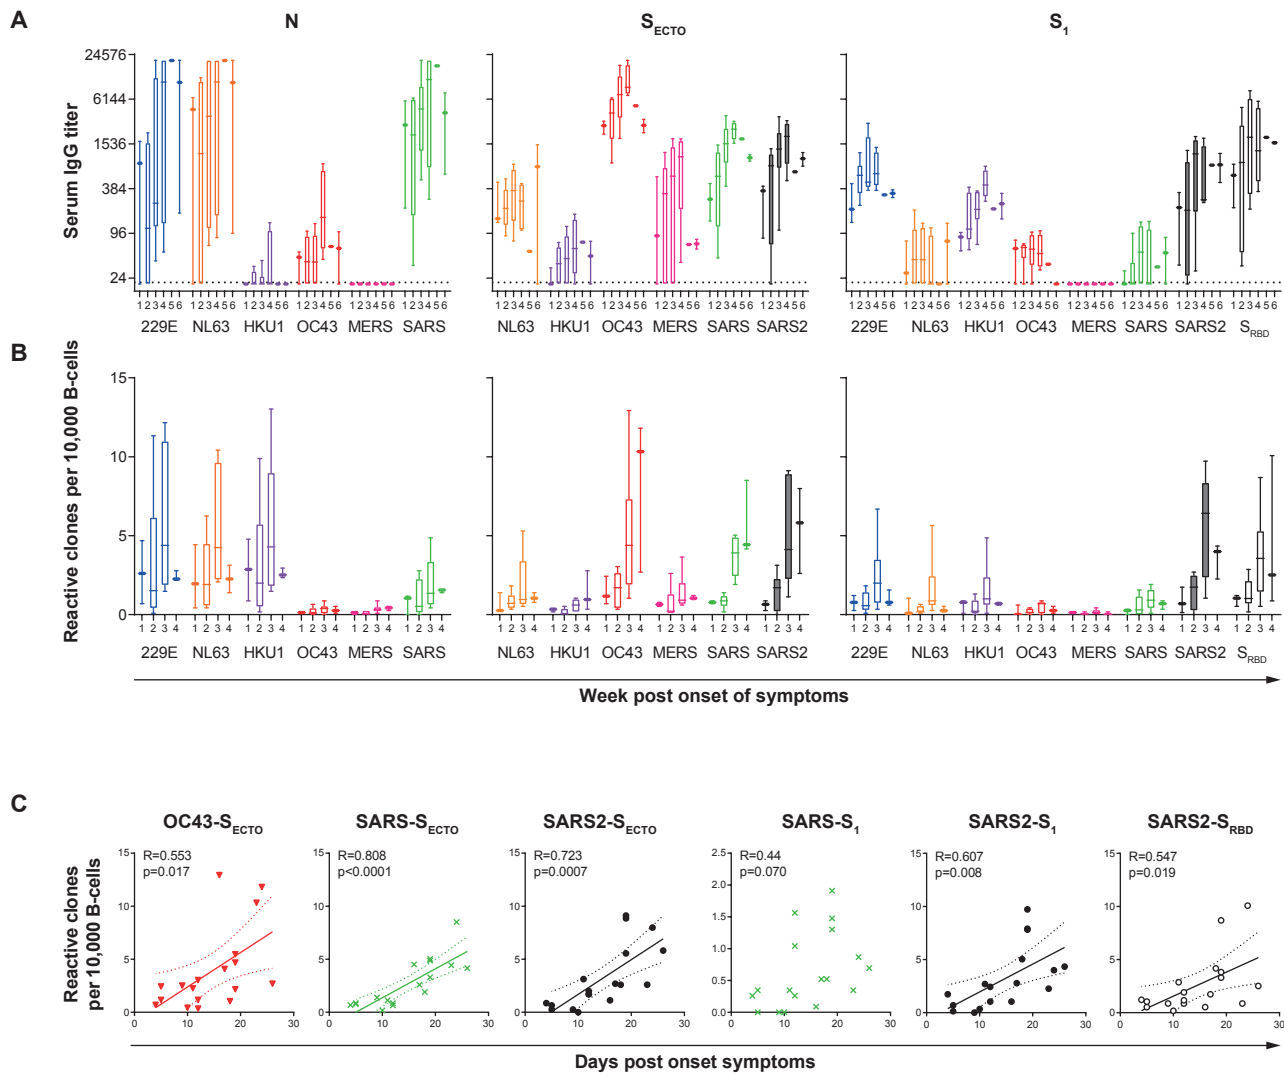

**Figure 1. Severe COVID-19 patients generate a strong SARS-CoV-2-specific IgG response and display an increasing IgG response towards other coronaviruses.**

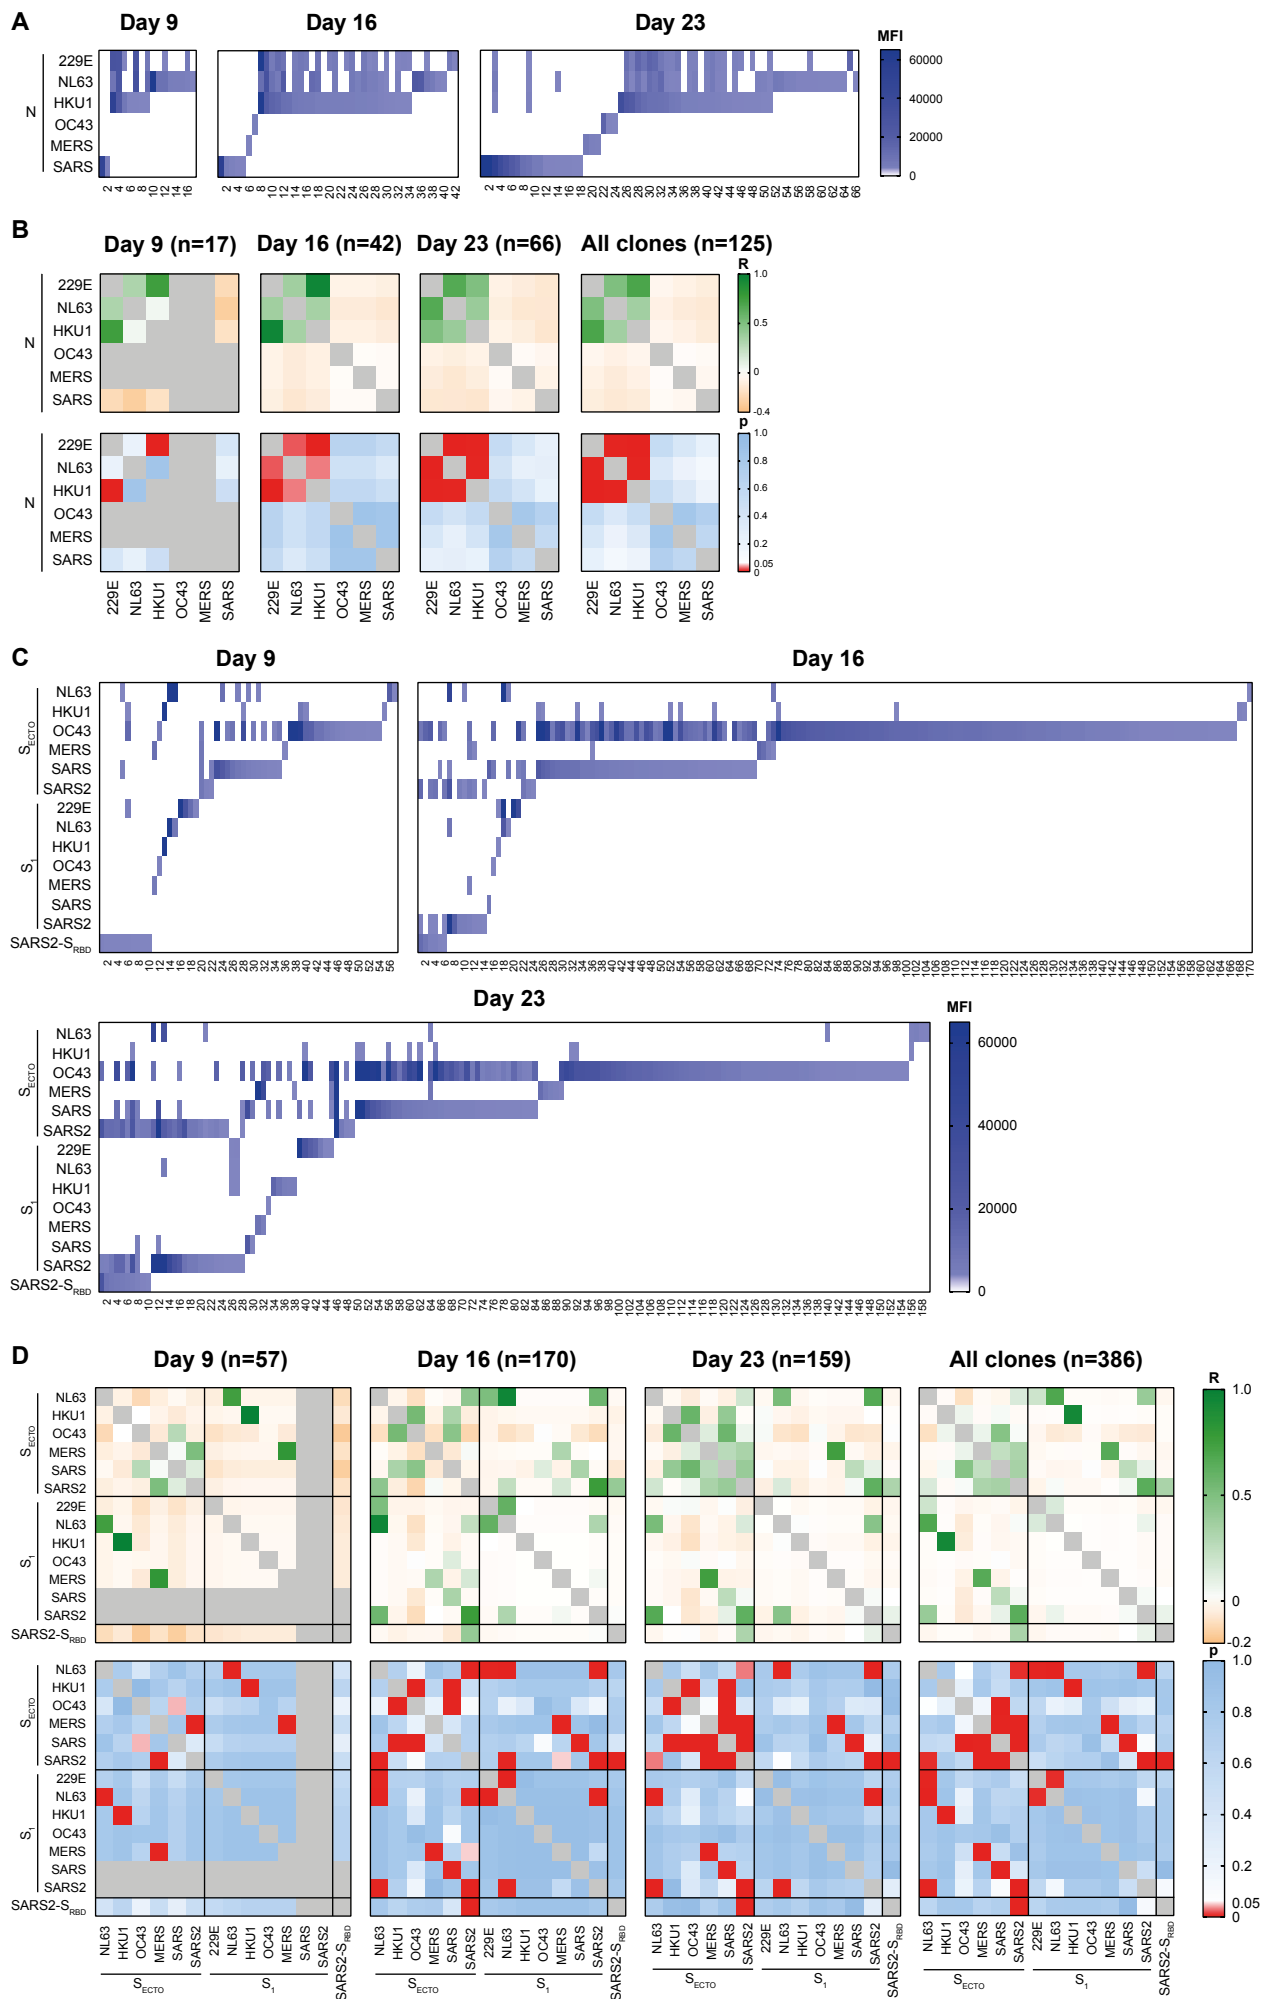

**Figure 2. Supernatants of in vitro stimulated B-cells of a representative donor shows clonal IgG cross-reactivity patterns towards different coronavirus strains.**

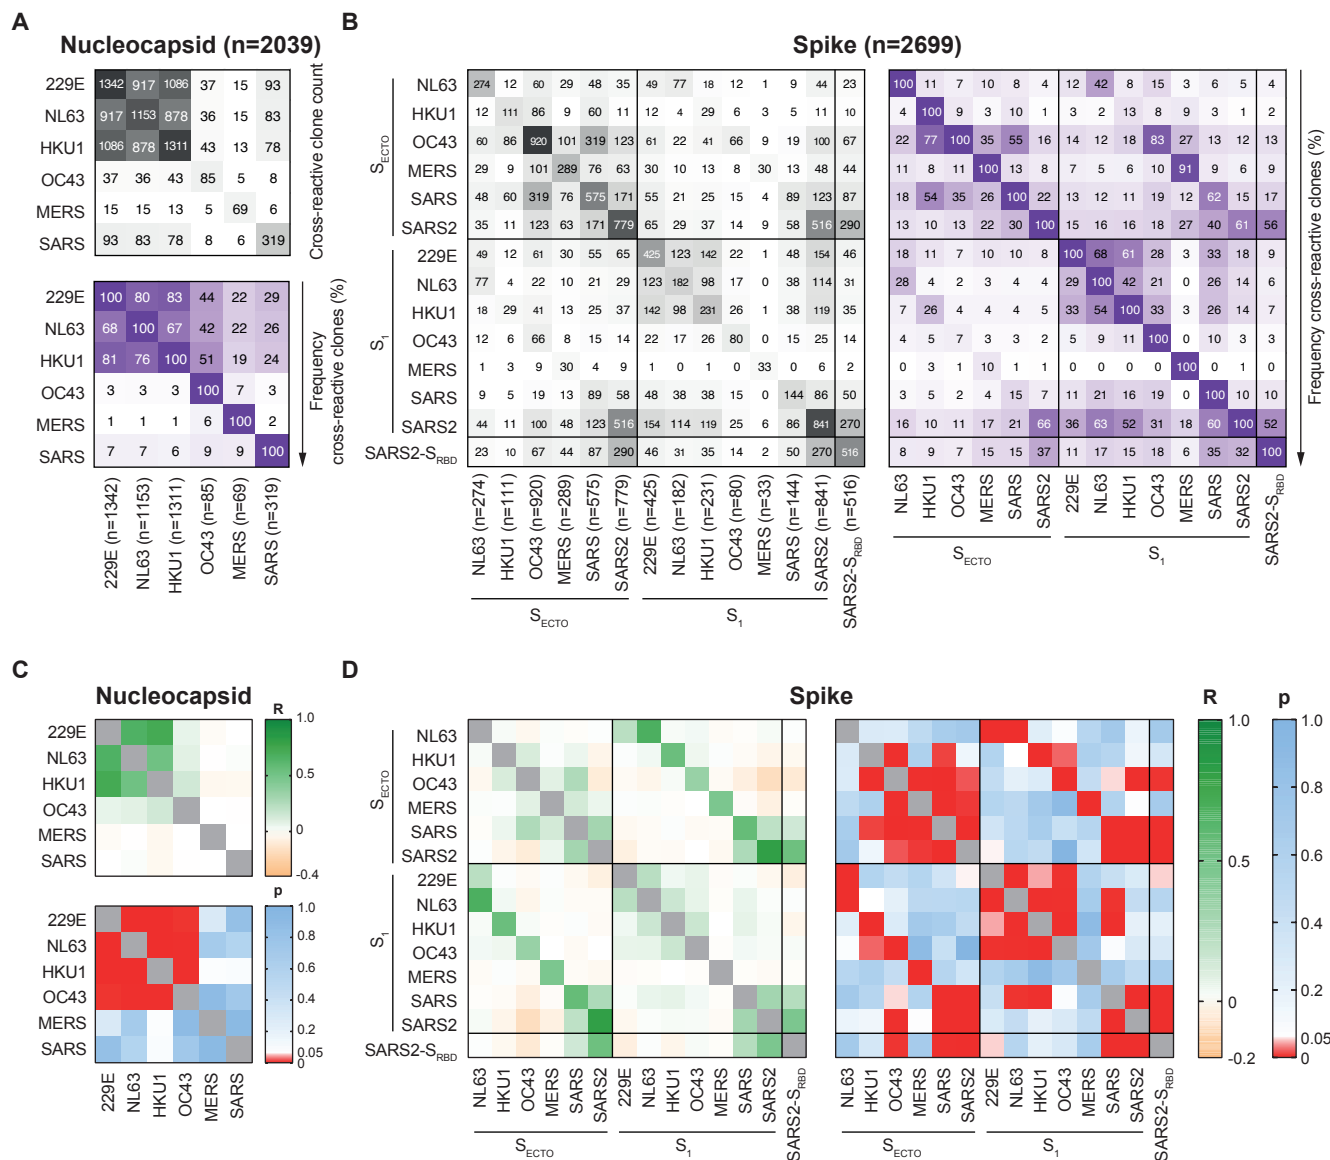

**Figure 3. Combined analysis of reactive clones from all donors shows cross-reactivity patterns between human seasonal and emerging coronaviruses.**

It is made available under a [CC-BY-NC-ND 4.0 International license](https://creativecommons.org/licenses/by-nc-nd/4.0/) .

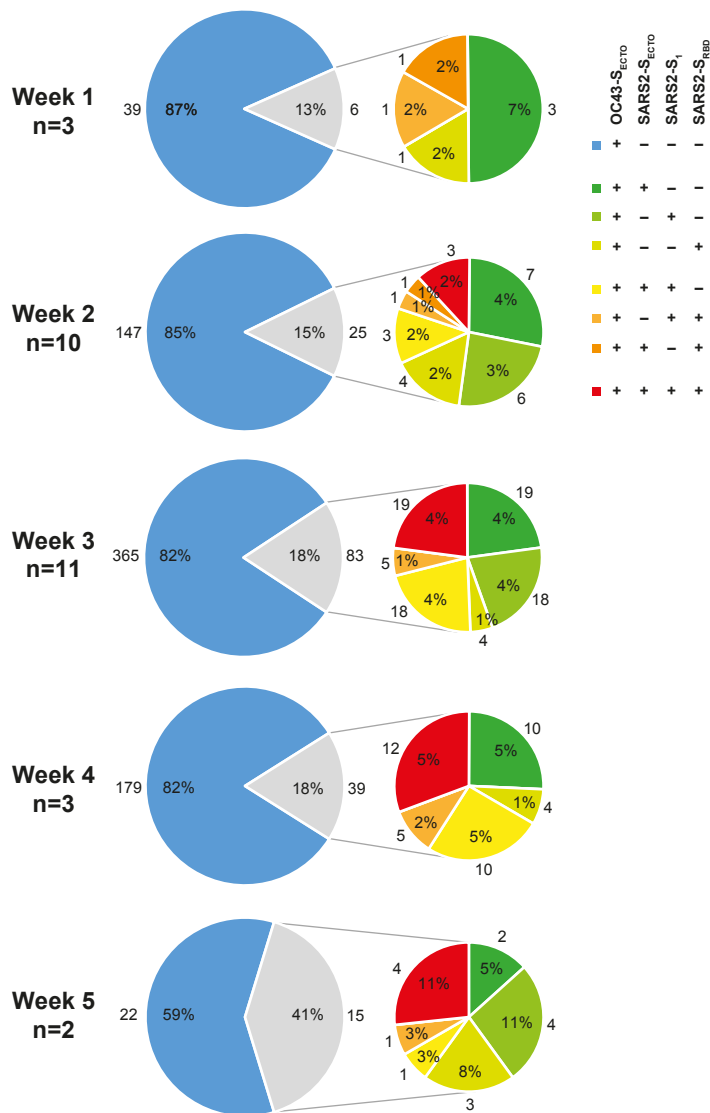

Figure 4. OC43-S<sub>ECTO</sub>-reactive clones show minor yet antigenically evolving cross-reactivity towards SARS-CoV-2.

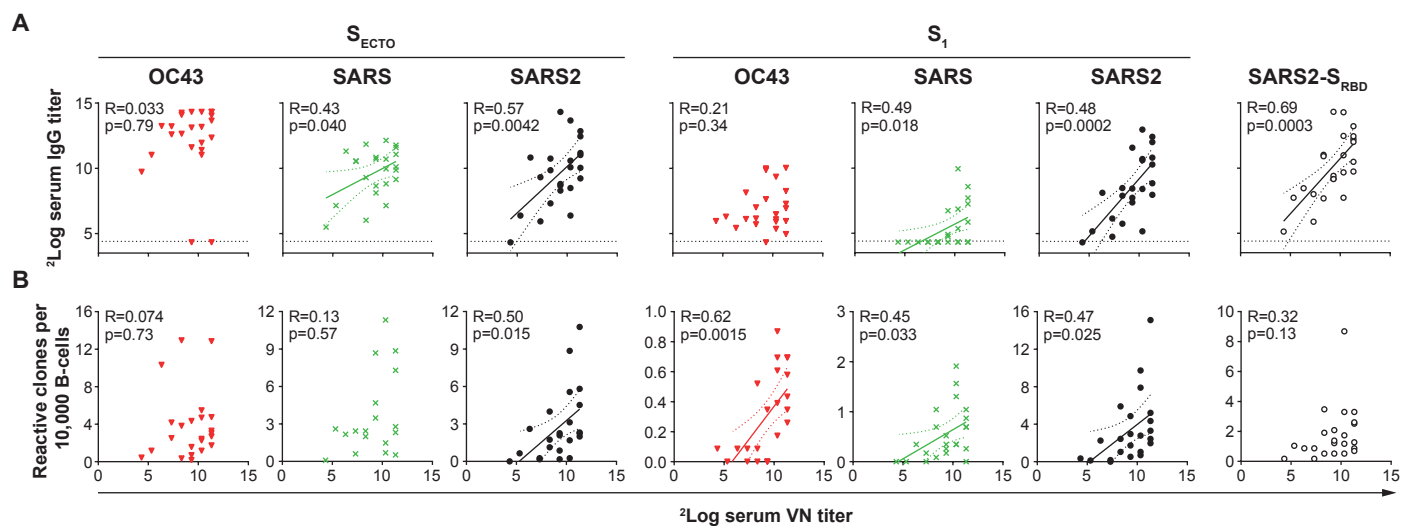

**Figure 5. Serum IgG titers or normalized B-cell counts reactive towards OC43-S<sub>1</sub>, SARS-S<sub>ECTO</sub>/S<sub>1</sub> and SARS2-S<sub>ECTO</sub>/S<sub>1</sub> correlate with serum SARS-CoV-2 virus neutralization titers, but not OC43-S<sub>ECTO</sub>.**
